# Supplementary material
Source: Springer Nature journal article supplement (https://www.springermedizin.de/resource/supplementary/12907_2005_31_MOESM1_ESM.pdf/9524954)

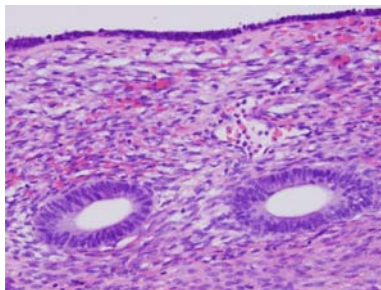

**1a**

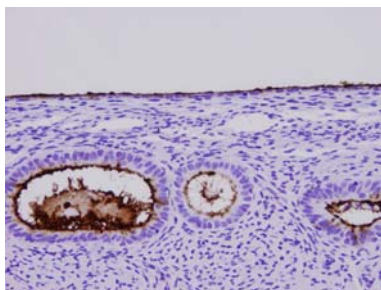

**1b**

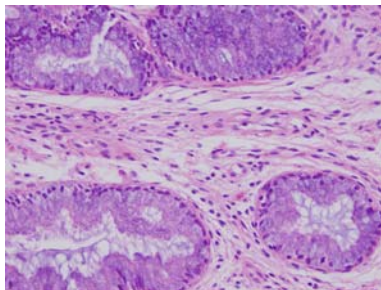

**1c**

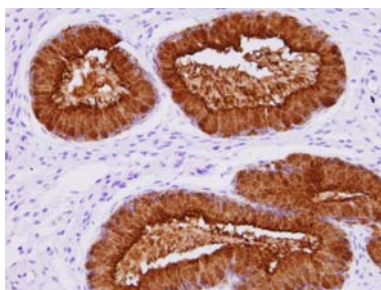

**1d**

Supplement: MOESM1 [file 9524954]
